1

2 · **Ancient origin and complex evolution of porcine endogenous retroviruses**

3

4 Yicong Chen<sup>1,2</sup> ¶, Mingyue Chen<sup>1</sup> ¶, Xiaoyan Duan<sup>1,2</sup>, and Jie Cui<sup>1\*</sup>

5

6 <sup>1</sup> CAS Key Laboratory of Special Pathogens and Biosafety, Center for Emerging  
7 Infectious Diseases, Wuhan Institute of Virology, Chinese Academy of Sciences,  
8 Wuhan 430071, China

9 <sup>2</sup> University of Chinese Academy of Sciences, Beijing 100049, China

10

11

12 \* Corresponding author

13 E-mail: [jiecui@wh.iov.cn](mailto:jiecui@wh.iov.cn) (JC)

14

15

16 ¶ Y.C. and M.C. contributed equally to this work.

17 **Abstract**

18 Porcine endogenous retroviruses (PERVs) are potential infectious agents of  
19 xenotransplantation as they are able to infect human cells and can be endogenized. To  
20 trace the origin of PERVs, we performed large-scale genomic mining of 142 mammal and  
21 14 pig genomes and investigated genomic dynamics and evolution of PERV-related viral  
22 “fossils”. Large-scale genetic alterations were found in most PERVs with many indels  
23 discovered, indicating the ancient origin of these viruses. Remarkably, two none-porcine  
24 species, lesser Egyptian jerboa (*Jaculus jaculus*) and rock hyrax (*Procavia capensis*),  
25 harbor endogenous retroviruses (ERVs), named eJJRV and ePCRv, which are closely  
26 related to PERVs. Molecular dating and phylogenetic analyses suggest that ancestral  
27 PERV originated from recombination of JJRV and PCRv in ancient pigs, which likely  
28 occurred in the late Miocene in Africa. Furthermore, we have discovered evidence of  
29 genomic rearrangement via PERVs during porcine evolution. Taken together, we decipher  
30 a complex evolutionary history for the modern PERVs.

31

32

### 33 **Introduction**

34 Xenotransplantation, the transplantation of tissues and organs from one species to another,  
35 may alleviate shortages of human donor organs (1, 2). Porcine organs are suitable for  
36 xenotransplantation due to the similar size and function of porcine and human organs, and  
37 the fact that pigs can be bred in large numbers (3). However, the potential risk of cross-  
38 species transmission of porcine microorganism specific porcine endogenous retroviruses  
39 (PERVs) limits the xenotransplantation of porcine organs into humans (4). PERV, as a  
40 member of retroviruses, could potentially cause immunodeficiency and tumorigenesis (3,  
41 5, 6).

42

43 PERVs are endogenous gammaretroviruses, and exist in the genomes of all pig strains (3,  
44 7). The envelope (*env*) genes of three PERV classes (PERV-A, -B and -C) differ, especially  
45 with respect to the receptor-binding domain (RBD) (8). Although there is no evidence of  
46 PERV transmission in patients receiving encapsulated pig islets (9-11), PERV-A and -B  
47 have been observed to infect both human cells and pig cells while PERV-C infects only  
48 pig cells (12). PERVs may also integrate into the human genome in vitro (13, 14). In pig  
49 cells, PERV-C can recombine with the *env* of PERV-A to produce A/C recombinants,  
50 which can infect human cells more efficiently (12). This increases the inherent risk in  
51 xenotransplantation and xenogeneic cell therapies.

52

53 While several studies have examined the evolutionary relationships between PERVs and  
54 other viruses, the origin of PERVs remains unknown (15, 16). At least two species that

55 belong to the same order as pigs (*Tayassu pecari* (of Eocene origin) and *Babyrousa*  
56 *babyrussa* (of Miocene origin)) lack PERVs (17). However, the common warthog  
57 (*Phacochoerus africanus*) carries PERVs, suggesting that an ancestral porcine species  
58 from the Miocene period (3.5 to 7.5 MYA) carried PERVs (17). PERVs have two different  
59 types of long terminal repeats (LTRs), one with a 39-bp repeat structure in the U3 region,  
60 and the other without this repeat structure (18, 19). The 39-bp repeats carried by PERV-A  
61 and -B confer strong promoter activity and thus increase transcription.(18, 19). However,  
62 the 39-bp repeat structure is absent in some PERV-A and all PERV-C. These PERVs thus  
63 have low transcriptional activity (18, 19). BLAST search analysis confirmed that the R  
64 and U5 regions of the PERV LTRs are highly conserved in the pig and mouse genomes  
65 (74–87% identity) (20). Indeed, LTRs of PERV-A, -B and LTR-IS (a LTR family found  
66 solely in the mouse genome) have similar structure (20). The conserved LTR sequences  
67 across pigs and mice might had originated from a common exogenous viral element, but  
68 have evolved independently (20). Thus, little is known about the evolutionary history of  
69 PERVs, their history is increasingly traceable as the number of available mammalian  
70 genomes grows. Using genome mining, we find that PERVs are ancient (dating from the  
71 late Miocene period), and for the first time, we reveal that the PERV ancestor likely  
72 originated from co-infection and recombination of non-porcine endogenous retroviruses  
73 (ERVs).

74

## 75 **Results**

### 76 **Characterization of putative full-length PERVs.**

77 Using previously reported PERV sequences as queries, we mined 14 pig genomes (Table  
78 S1) available in GenBank, and showed detailed genome-wide distribution of full-length  
79 PERVs with two flanking LTRs. We initially compiled a PERV dataset that included 84  
80 previously classified (30 PERV-A, 39 PERV-B and 15 PERV-C) and 18 unclassified  
81 PERVs (i.e., lacking of *env* gene) (Table S2). The number of classified PERVs ranged  
82 from 38 copies in Duroc pig to 1 in the Tibetan pig. We identified 2–10 PERVs in each of  
83 12 other pig breeds, including Meishan, Goettingen, and Large White. We removed 19  
84 previously classified PERV sequences that were low quality fragments (> 200 “N” bases).  
85 The final dataset consisted of 65 high quality classified PERV (27 PERV-A, 29 PERV-B,  
86 and 9 PERV-C), and the genomic structures of the 65 PERVs are summarized in Fig. 1.  
87 PERVs had large-scale genetic alterations induced by indels and stop codons (Fig. 1),  
88 indicating a relatively long evolutionary history. PERV LTR were classified by the  
89 presence (LTR B) or absence (LTR A) of the 18 bp and 21 bp repeat structure reported  
90 previously (8, 18, 21). Three different type B LTRs in the PERV were identified,  
91 distinguished by the number of 18 bp and 21 bp repeat sequences: LTR B1 (two 18-bp and  
92 one 21-bp repeats), LTR B2 (three 18-bp and two 21-bp repeats), and LTR B3 (four 18 bp  
93 and three 21 bp repeats). Of the 65 high-quality PERVs we analyzed, we assigned 57, of  
94 which 32 (>55%) carried LTR A, 10 carried LTR B1, 13 carried LTR B2, and 2 carried  
95 LTR B3. LTR A was identified in PERV-A and -C, and LTR B1 was identified in PERV-A  
96 and -B. LTR B2 and LTR B3 were only identified in PERV-B. The remaining eight PERVs

97 contained different types of 5'- and 3'- LTR, which may reflect PERV recombination over  
 98 evolutionary time.

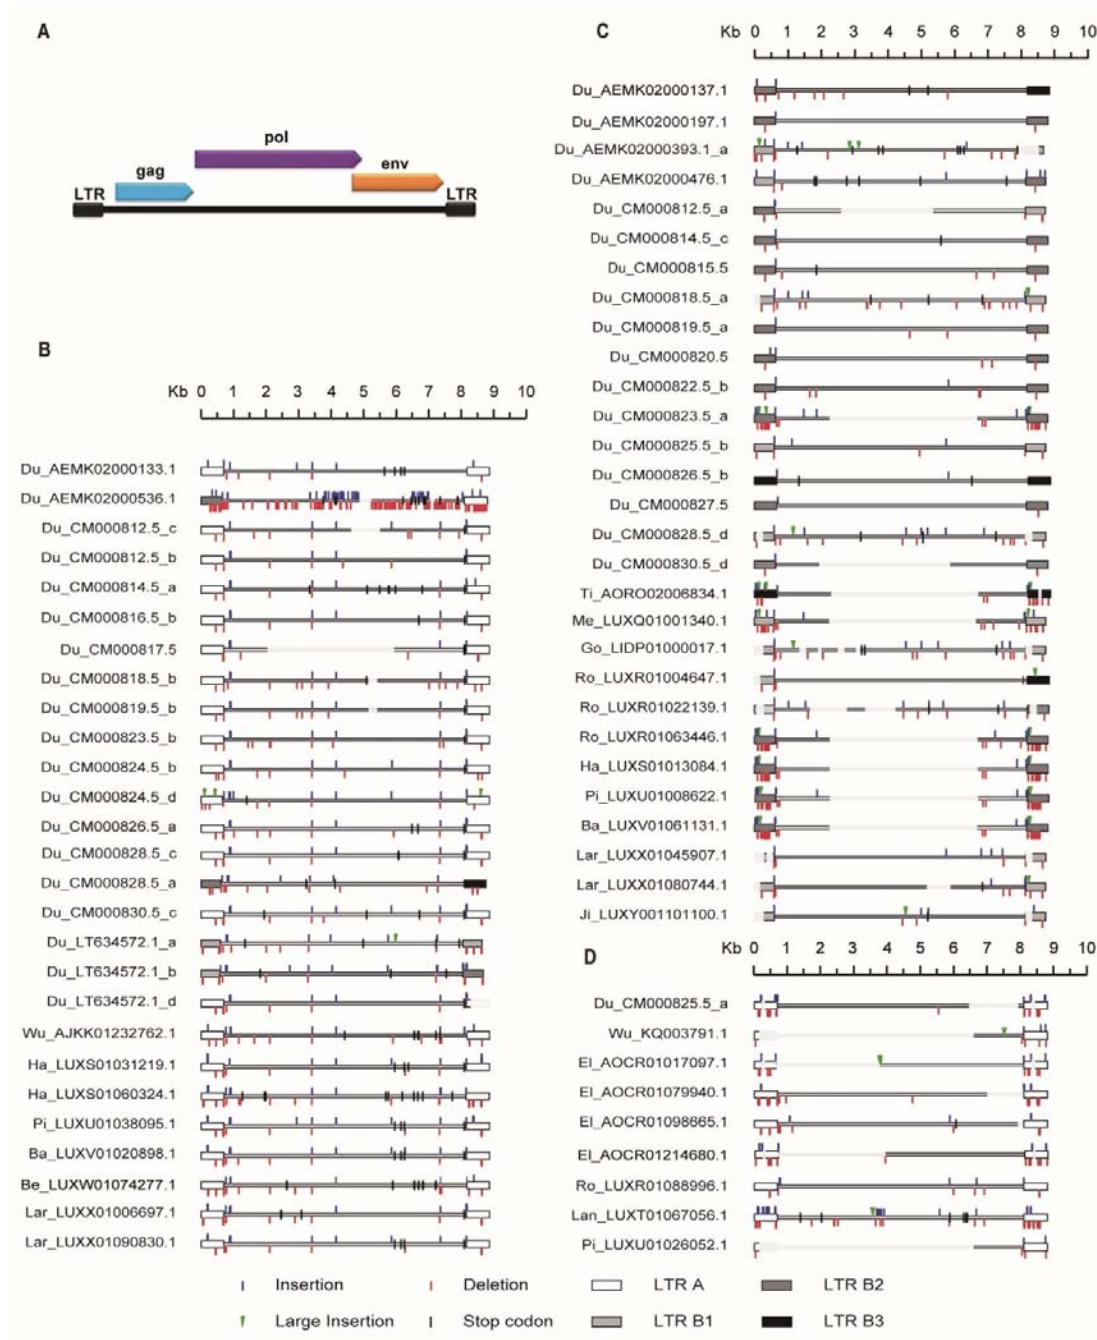

99  
 100 **Fig. 1. PERV proviruses in porcine genomes.** (A) Genomic structure of PERV, including  
 101 *gag*, *pol* and *env* genes and LTRs. Proviruses of PERV-A (B), PERV-B (C) and PERV-C  
 102 (D) groups depicted based on reference PERV-A (accession number: AF435967.1), PERV-

103 B (accession number: EU523109.1) and PERV-C (accession number: HQ536015.1). LTRs  
104 of PERVs were classified by the presence (type B) or absence (type A) of the 18 bp and 21  
105 bp repeat structure. Type B LTRs were divided into 3 subtypes (LTR B1, LTR B2 and LTR  
106 B3). LTR A, B1, B2 and LTR B3 are presented in white, light gray, dark gray and black,  
107 respectively. Insertions and deletions (< 50 bp) are depicted with blue and red flags  
108 respectively. Larger insertions (>50 bp) are labeled with green arrow. Large deletions (>50  
109 bp) are shown without lines. Stop codons are showed with a black flag. (Abbreviation: Du,  
110 Duroc pig; Wu, Wuzhishan pig; El, Ellegaard pig; Ti, Tibetan pig; Go, Goettingen pig;  
111 Me, Meishan pig; Ro, Rongchang pig; Ha, Hampshire pig; Lan, Landrace pig; Pi, Pietrain  
112 pig; Ba, Bamei pig; Be, Bekshire pig; Lar, LargeWhite pig; Ji, Jinhua pig)

113

#### 114 **Recombination.**

115 To identify recombined PERVs, we constructed a neighbor-joining tree representing the  
116 5'- and 3'- LTR sequences of full-length PERVs across 14 genomes. The resulting  
117 phylogenetic tree was divided into three large clusters (Fig. S1), suggesting that the ages  
118 of individual PERVs varied and that three large integration events had occurred.  
119 Retrovirus integration creates a short duplication called target site duplication (TSD)  
120 flanking the LTR (22, 23). Here, 4 bp TSDs were flanking the provirus. Remarkably, 11  
121 PERVs did not share the same TSD (Table 1, Table S3), likely due to chromosomal  
122 rearrangement through homologous recombination between distant PERVs, as mentioned  
123 in a previous study of primate ERV (24).

124

125 **Table 1. PERVs with different TSDs.**

| Name           | Accession number | Divergent LTRs based on structure <sup>a</sup> | Divergent LTR based on tree | Flanking TSD <sup>b</sup> |      |
|----------------|------------------|------------------------------------------------|-----------------------------|---------------------------|------|
|                |                  |                                                |                             | 5'                        | 3'   |
| AEMK02000536.1 | AEMK02000536.1   | yes                                            | yes                         | AGCC                      | CTTT |
| CM000818.5_a   | CM000818.5       | no                                             | yes                         | GTTC                      | CTTC |
| CM000826.5_c   | CM000826.5       | no                                             | no                          | ACCA                      | AATC |
| CM000828.5_d   | CM000828.5       | no                                             | yes                         | CCAC                      | CACC |
| KQ001967.1     | KQ001967.1       | no                                             | yes                         | CCAC                      | CACC |
| LIDP01000017.1 | LIDP01000017.1   | no                                             | yes                         | CCAC                      | CACC |
| LUXR01004647.1 | LUXR01004647.1   | yes                                            | yes                         | GTTC                      | CTTC |
| LUXR01022139.1 | LUXR01022139.1   | yes                                            | yes                         | CCAC                      | CACC |
| LUXX01045907.1 | LUXX01045907.1   | no                                             | yes                         | CCAC                      | CACC |
| LUXX01080744.1 | LUXX01080744.1   | no                                             | yes                         | GTTC                      | CTTC |
| LUXY01101100.1 | LUXY01101100.1   | no                                             | yes                         | CCAC                      | CACC |

126 <sup>a</sup> LTRs of PERVs are divided into 4 types (LTR A, B1, B2, and B3). If two different types  
127 of LTRs are flanking the PERV, the LTRs are divergent.

128 <sup>b</sup> Only TSDs flanking the intact 5' and 3' LTRs sequences were analyzed

129

### 130 **Detection of PERV-related sequences in mammalian genomes.**

131 After screening 142 mammalian genomes (Table S4) in Genbank, we identified a  
132 sequence (accession number: NW\_004504334.1) in the genome of lesser Egyptian jerboa  
133 (*Jaculus jaculus*) that showed highly significant similarity (for *gag* and *pol*: >75%  
134 nucleotide identity over 95% region; for *env*: >75% nucleotide identity over 55% region)  
135 to PERVs using tBLASTn and choosing three major proteins (Gag, Pol and Env) of  
136 PERVs as queries. Using this PERV-related sequence as query, three other possible PERV  
137 related sequences were identified in *J. jaculus* (accession number: NW\_004504375.1,



138 NW\_004504378.1, and NW\_004504445.1) with >85% nucleotide identity over 80% of  
139 the query sequence. The four PERV-related sequences identified in *J. jaculus* were  
140 designated eJRVs. These sequences were located in large scaffolds > 5 Mb long, which  
141 indicated that the eJRV sequences were relatively reliable. One full-length eJRV  
142 (accession number: NW\_004504334.1) is annotated in Fig. S2.

143

144 To demonstrate the similarity between PERVs and eJRVs, we generated pairwise  
145 alignments of eJRV and PERV nucleotides using the most closely related full-length  
146 ERVs, and performed a sliding window analysis of these pairwise alignments (25, 26). For  
147 comparison, we determined the similarity of HIV-1 provirus sequence to that of its closest  
148 relative (chimpanzee SIVcpz) (27, 28). We found that between eJRV and PERV-A, -B  
149 and -C, *gag* and *pol* were more similar than HIV-1 and SIVcpz (Fig. 2D). However, the  
150 RBD and the proline rich-region (PRR) of the surface subunit (SU) of *env* were dissimilar  
151 between eJRV and PERV-A, -B and -C, and this pattern was also found between HIV and  
152 SIVcpz. In PERVs, the RBD and PRR determine the host range (29-32), suggesting that,  
153 although *gag* and *pol* were similar between eJRVs and PERVs, they have a distinct host  
154 range. To characterize the relationship between eJRVs and PERVs, we constructed  
155 phylogenetic trees of Gag, Pol and Env, first removing the divergent RBD. Data show that  
156 eJRVs clustered with PERVs (Fig. 2A-C), which suggested that PERVs and eJRVs  
157 might share common ancestor. In Fig. 2C, a sub-branch close to PERV-A and PERV-C was  
158 showed, and the PERVs in the branch were named as PERV-IMs, which were present in  
159 all 14 pig genomes. The Env proteins of PERV-IMs showed relatively low similarity to

160 that of PERV-A, -B, and -C. And RBD region alignment suggested that PERV-IM was  
 161 distinct from PERV-A, -B and -C (Fig. 3). So PERV-IM could be a new class of PERVs.

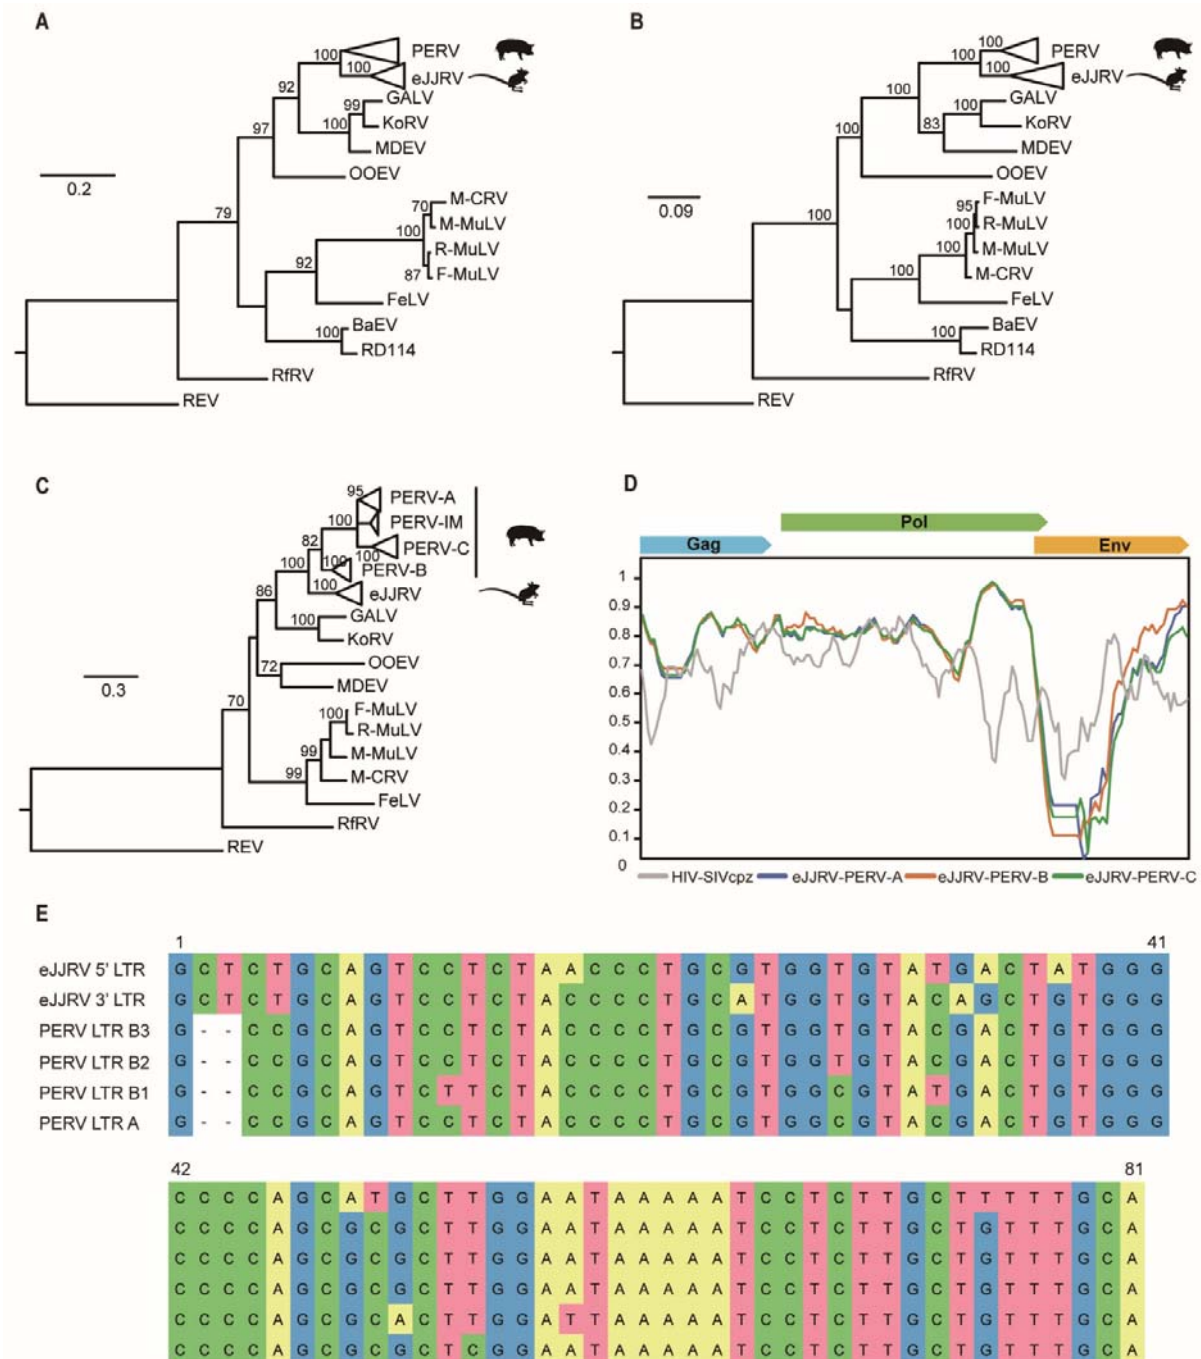

162 **Fig. 2. The comparison of PERVs and eJRVs.** Phylogenetic trees of Gag (A), Pol (B)  
 163 and Env (C) constructed using amino acid sequences of PERVs, eJRVs and other

164 representative gammaretroviruses (Table S5). Bootstrap values <65% are not shown in  
165 phylogenetic trees. Trees were rooted using Reticuloendotheliosis virus (REV). The  
166 complete phylogenetic trees of Gag (A), Pol (B) and Env (C) are shown in Fig. S3-S5,  
167 respectively. (D) Sliding window analysis of percent sequence identity along pairwise  
168 alignments of proviruses without LTRs. (E) Alignment of R region of LTR in eJRV and  
169 PERVs.

170

171

172 As the quality of another three of the eJRVs were poor, we were only able to identify one  
173 pairwise eJRV LTRs. The length of 3'- LTR of the eJRV is 674 bp while 5'- LTR is  
174 932bp which has a 258 bp insertion. We aligned eJRV LTRs with PERV LTRs. The start  
175 of the U3 region and the end of the U5 region are distinct and not included in the  
176 alignment (Fig. S6). The alignment of the R region supported a close relationship between  
177 the eJRV and the PERVs (Fig. 2E). The eJRV LTRs included a repeat structure (three 18  
178 bp and two 21 bp repeat sequences) in the U3 region, identical to that of the PERV LTR  
179 B2. Alignment analysis of the repeat structure revealed a closer relationship between LTRs  
180 of the eJRV and LTR B2 of PERVs (Fig. S6). Furthermore, 3' LTR of eJRV had high  
181 identity with LTR B2 of PERV (~73%). Therefore, our results indicated that eJRVs and  
182 PERVs were homologous.

183

184 The RBDs of eJRVs and PERVs were distinct, so we used the RBD amino acid sequences  
185 from PERV-A, -B and -C as queries to screen homologous viral elements. The eight

186 significant hits (>60% amino acid identity over 80% region) were obtained in rock hyrax  
187 (*Procavia campensis*) of *Procaviidae*, and all 8 hits were located in large scaffolds >0.3  
188 Mb long (accession number: KN678690.1, KN676491.1, KN678005.1, KN677924.1,  
189 KN676905.1, KN676182.1, KN680906.1, and KN676638.1). We examined the gene  
190 flanking the eight hits (especially *pol*), and found that ERVs including these hits were  
191 endogenous gammaretroviruses. These hits were therefore designated ePCRVs. We  
192 aligned the RBDs of PERVs and ePCRVs, and found that ePCRVs were highly similar to  
193 PERVs (Fig. 3). To quantify the homology between ePCRVs and PERVs, we made  
194 pairwise comparisons. Our comparisons suggested that ePCRV\_1 and ePCRV\_2 had a  
195 high identity with PERV-B (63%) but a low identity with PERV-A, -C and PERV-IM (40–  
196 43%). Therefore, PERV RBD might be derived from ePCRVs, and the divergence of RBD  
197 of PERVs might have occurred after the recombination of PCRVs and JIRVs.

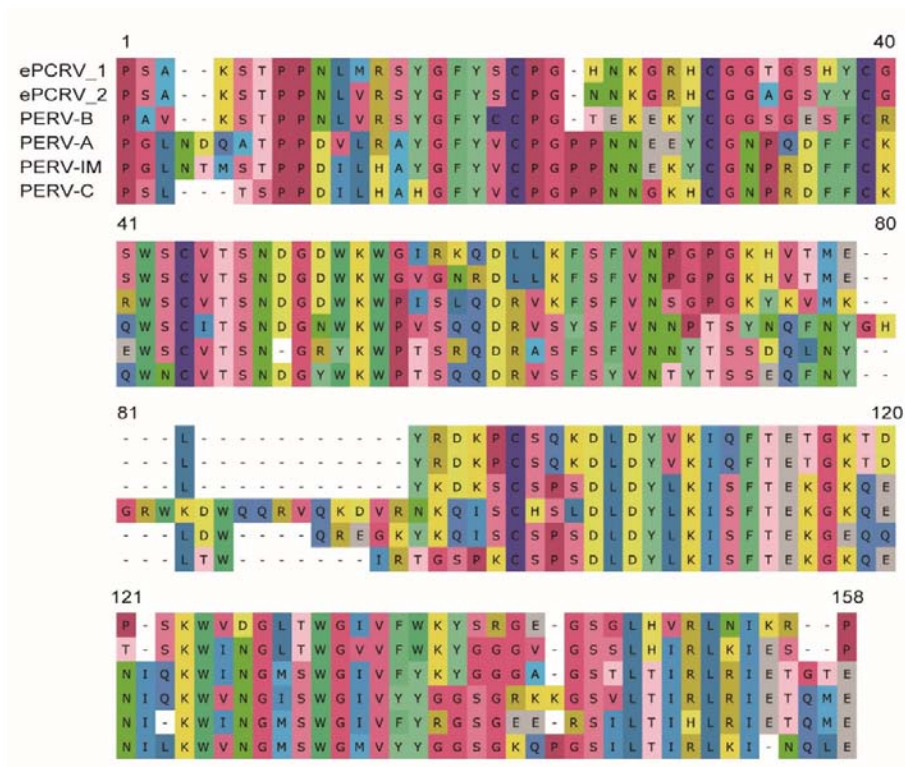

198

199 **Fig. 3. Amino acid sequence comparison of RBD of PERVs and ePCRVs.** Two  
200 ePCRVs (ePCRV\_1 and ePCRV\_2) predicted to harbor both the 5' and 3' LTRs were  
201 selected to align with PERVs.

202

### 203 **Molecular dating analysis.**

204 To better understand the integration time of PERVs, we used an LTR-divergence method  
205 to estimate when PERVs and eJRVs invaded the host genome. This estimation method  
206 was based on divergence between 5'- and 3'- LTR of ERVs. Because nucleotide  
207 substitution rates of *S. scrofa*, *J. jaculus* and *P. canpensis* were unknown, we used an  
208 average mammal neutral substitution rate ( $2.2 \times 10^{-9}$  per site per year) (33) for these three  
209 species. Our results indicated that PERV-A first invaded the *Suidae* ~6.6 MYA, while  
210 PERV-B first invaded ~6.4 MYA. In contrast, the invasions of PERV-C and PERV-IM  
211 were relatively recent (~3.4 MYA and ~4.4 MYA, respectively) (Fig. 4, Table S2). Thus,  
212 the oldest PERV-A and PERV-B invaded the host just after the *Suidae* split from the  
213 ancestral group (~7.3 MYA) (34). PERV-A, -B and -C has continued to integrate into pig  
214 genomes, resulting in increasing numbers of insertions. Because the LTRs of three eJRVs  
215 were incomplete, our eJRV results were based on only one provirus. eJRVs was  
216 estimated to have integrated ~17.2 MYA, which is well before *J. jaculus* speciated (~11.1  
217 MYA), but later than the speciation of *Dipodidae* (~42.7 MYA) (35). ePCRV integration  
218 time was calculated based on two full-length ePCRVs. ePCRVs insertions were estimated  
219 to be much older than PERVs (~10.7 MYA and ~8.4 MYA).

220

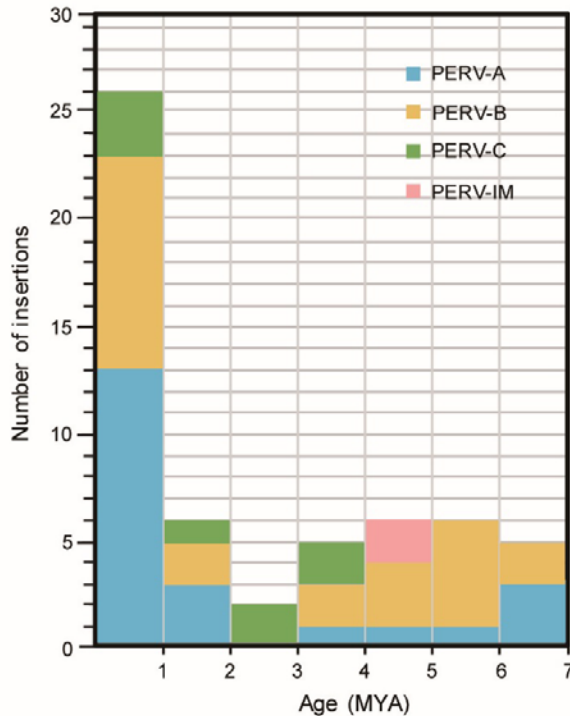

221

222 **Fig. 4. Dating of PERVs insertion based on LTR-LTR divergence.** The Y axis shows  
223 the number of insertions for different classes and X axis indicates the putative insertion  
224 time using MY as a unit. PERVs with LTR > 300 bp are used for estimation.

225

#### 226 **Evolutionary history of PERVs.**

227 Taken together, evolutionary history of PERVs could be divided into four stages. First,  
228 JRVs, the most closely related ERVs to PERVs, integrated into *Dipodidae* ~17.2 MYA.

229 But the SU subunits of *env* were dissimilar between eJRVs and PERVs, indicating that  
230 the subunit may be derived from other ERVs (Fig. 5). Then ePCRVs emerged ~10.7 MYA,

231 and the SU subunit of *env*, especially RBD, was highly similar to that of PERVs, which  
232 suggested that PCRVs may also be a donor of the ancestral PERV. Third, the ancestral

233 PERV emerged. The oldest modern PERV, PERV-A integrated into *Suidae* ~6.6 MYA just

234 after the emergence of *Suidae* (~7.3 MYA). It is possible that the ancestral PERV



235 originated from the co-infection and recombination of JJRVs and PCRVs, and originally  
236 appeared around the late Miocene (~6.6 - 7.3 MYA) after the emergence of *Suidae*.  
237 Finally, after rapid adaptation in *Suidae*, PERV-A and -B diverged from the ancestral  
238 PERV ~6.6 MYA and ~6.4 MYA, respectively. The integration of PERV-IM occurred  
239 around ~4.4 MYA, between the integration of earliest PERV-A (~6.6 MYA) and PERV-C  
240 (~3.4 MYA). The homologies between PERV-A and -C are reported to be ~85%, while  
241 those between PERV-B and both PERV-A and PERV-C barely exceed 70% (17).  
242 Moreover, PERV-C harbors only one type of LTR, LTR A, which is also present in PERV-  
243 A, but not PERV-B. PERV-A and -B can infect cells from several species including  
244 humans while PERV-C infects only pig cells (7, 12, 36). It is possible that PERV-C  
245 descended from PERV-A, but lost the ability to infect other species in order to increase its  
246 adapt ability.

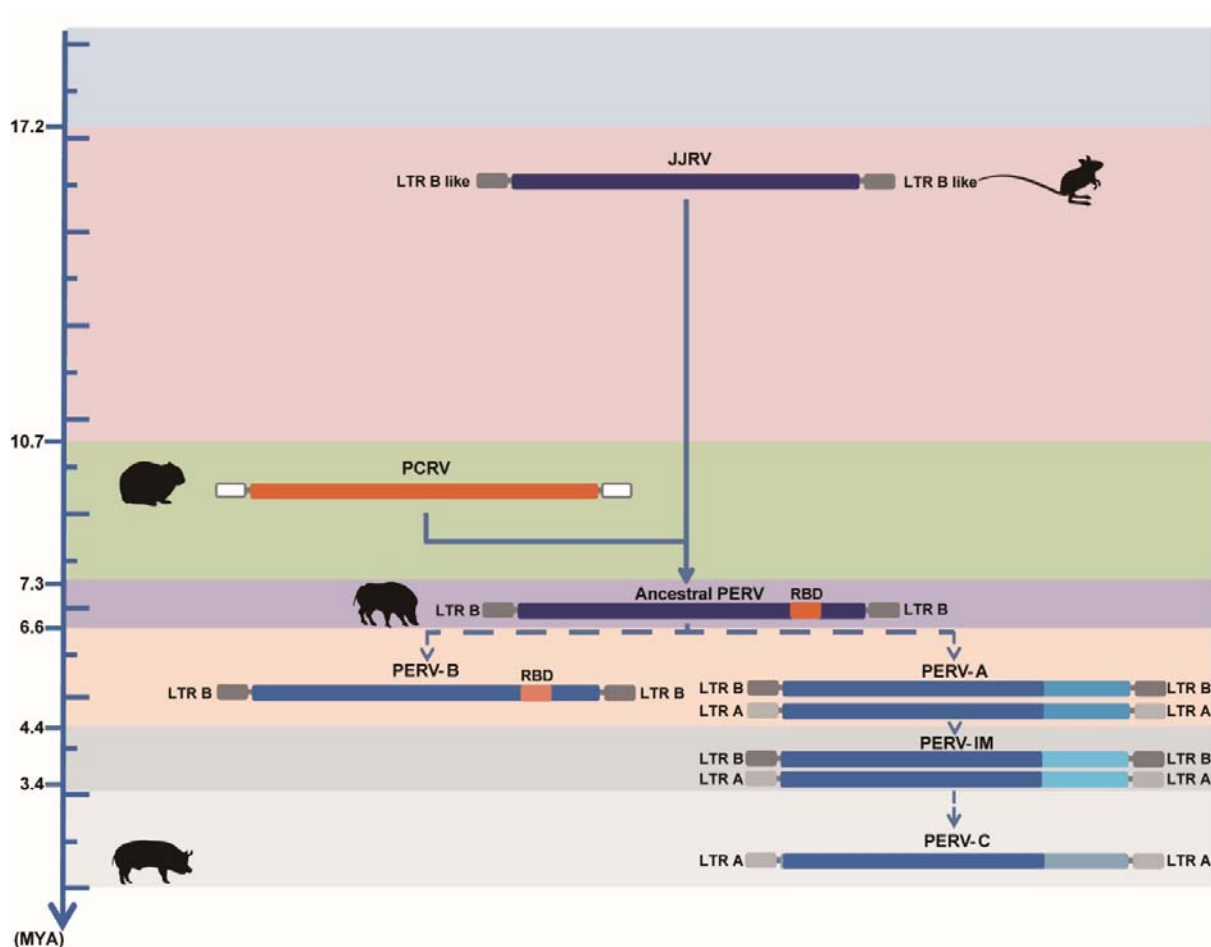

247

248 **Fig. 5. Evolution history of PERVs.** Time-calibrated arrow indicates putative insertion  
249 time of each type of ERVs. Different background colors illustrate evolution periods of  
250 PERVs. Solid arrows show recombination events and dotted arrows show speciation.  
251 Evolutionary history of PERVs could be divided into four stages. Pink background (the  
252 first stage) represents eJRVs appearance (~17.2 MYA), before the emergence of ePCRVs  
253 (~10.7 MYA). Green (the second stage) represents the emergence of ePCRVs (~10.7  
254 MYA), just before the emergence of *Suidae* (~7.3 MYA). Purple (the third stage)  
255 represents the period when eJRVs and ePCRVs co-infected and recombined, which  
256 resulted in the emergence of ancestral PERV, just after the emergence of *Suidae* (~7.3  
257 MYA). Until ~6.6 MYA the modern PERV-A emerged. Orange, blue and light grey (the  
258 fourth stage) represents the period when modern PERVs (PERV-A, -B, -C, and -IM)  
259 emerged and evolved. Orange represents the emergence of PERV-A (~6.6 MYA) and -B  
260 (~6.4 MYA), just before the emergence of PERV-IM (~4.4 MYA). Blue represents the  
261 emergence of PERV-IM (~4.4 MYA), just before the emergence of PERV-C (~3.4 MYA).  
262 Light grey represents the period when PERV-C emerged, which can be dated back to ~3.4  
263 MYA.

264

265

## 266 **Discussion**

267 Using systematic large-scale genome mining, we analyzed the origin and evolution of  
268 PERVs. eJRV, the most closely related ERV to PERVs, can be traced back to ~17.2 MYA,



269 which is well before *J. jaculus* speciated (~11.1 MYA), but later than the speciation of  
270 *Dipodidae* (~42.7 MYA). Unexpectedly, homologous LTRs of PERVs (~73% identity)  
271 were also found in 8 *Muroidea* species (*Mus caroli*, *M. pahari*, *M. musculus*, *M. spretus*,  
272 *Apodemus speciosus*, *A. sylvaticus*, *Rattus norvegicus* and *Phodopus sungorus*). The  
273 coding genes (*gag*, *pol*, and *env*) near these homologous LTRs were identified. Also,  
274 previously study found ERV in 2 *Muroidea* species (*M. musculus*, *R. norvegicus*)(37). But  
275 phylogenetic analysis suggested that coding genes were distantly related to PERVs and  
276 eJRVs (Fig. S7). The homologous LTRs in *Muroidea* and *Dipodoidea* (especially eJRVs)  
277 indicated that PERV-related LTRs have integrated into rodents before the divergence of  
278 *Muroidea* and *Dipodoidea* from a common ancestor (~53.0 MYA). Then the LTR-related  
279 ERVs in *Muroidea* and *Dipodoidea* evolved separately. *Dipodoidea* became the most  
280 closely related ancestor of PERVs until eJRVs emerged (~17.2 MYA).

281

282 PERVs (~6.6 MYA), JRVs (~17.2 MYA), and PCRVs (~10.7 MYA) integrated into  
283 *Suidae*, *Dipodidae*, and *Procaviidae*, respectively. The fossil records of *Suidae* *Dipodidae*,  
284 and *Procaviidae* also support this speculation of evolution of PERVs. Miocene (23 - 5.33  
285 MY) *Suidae* fossils have been found in East Africa, Europe and Asia  
286 ([http://fossilworks.org/?a=taxonInfo&taxon\\_no=42381](http://fossilworks.org/?a=taxonInfo&taxon_no=42381)). Miocene *Dipodidae* fossils have  
287 been found in North Africa, Europe and Asia  
288 ([http://fossilworks.org/?a=taxonInfo&taxon\\_no=41695](http://fossilworks.org/?a=taxonInfo&taxon_no=41695)); Pliocene (5.3 - 2.59 MY)  
289 *Dipodidae* fossils have been identified in East Africa, thus suggesting that the *Dipodidae*  
290 may have spread to East Africa during the Miocene. Miocene *Procaviidae* fossils have

291 been found in South of Africa and East Africa  
292 ([http://fossilworks.org/?a=taxonInfo&taxon\\_no=43293](http://fossilworks.org/?a=taxonInfo&taxon_no=43293)). According to the current fossil  
293 records, the only shared region for Miocene *Dipodidae*, *Procaviidae* and *Suidae* fossils is  
294 East Africa. So co-infection and recombination may occurred between retroviruses carried  
295 by *Dipodidae* and *Procaviidae* in East Africa during the Miocene, and then recombinants  
296 may invaded the *Suidae*, producing ancestral PERV.

297

298 In summary, for the first time, we decipher a complex evolutionary history for the PERVs.  
299 The ancestral PERV might derive from recombination and co-infection of JJRVs and  
300 PCRVs from *Dipodidae* and *Procaviidae*. Then the ancestral PERV split into two classes  
301 (PERV-A and PERV-B). Finally, PERV-C diverged from PERV-A. We also suggest that pig  
302 genomes have been shaped by PERV invasions, as specifically reflected by PERV-  
303 associated genomic rearrangement that have occurred during porcine evolution. In a word,  
304 modern PERVs have a complex evolutionary history prior to their appearance in pigs.

305

306 **Materials and Methods**

307 ***In silico* identification of PERV and PERV-related proviruses.**

308 To identify PERV proviruses in *Sus scrofa*, tBLASTn (38) was used and amino acid  
309 sequences of Gag, Pol and Env of 20 representative PERV proviruses (accession number:  
310 HQ536016.1, HQ536015.1, HQ536013.1, KC116220.1, AY570980.1, HQ540592.1,  
311 HQ536007.1, AX546209.1, AF435967.1, AY953542.1, HQ540591.1, AY099323.1,  
312 AJ133817.1, EU523109.1, EF133960.1, AY056035.1, AY099324.1, A66553.1,  
313 HQ536011.1, and HQ536009.1) were chosen as queries to search the 14 pig genomes  
314 available in Genbank that were released before November 2017. A 50% identity over 50%  
315 region was used to filter significant hits. It has been shown that PERVs harbor two LTR  
316 structures, one with and one without a repeat structure in the U3 region (8, 18). Using two  
317 typical LTRs as queries we extended flanking sequences of coding domains of PERVs to  
318 identify LTRs with BLASTn, and TSDs were used to define boundaries of PERV. LTR  
319 lengths were defined as 100–1,000 bp. PERVs with at least one LTR and one coding gene  
320 were screened for the next analysis.

321 To identify PERV-related proviruses in mammals, tBLASTn was used with the queries  
322 mentioned above in 20 representative PERV proviruses to search 142 mammal genomes  
323 available in Genbank that were released before November 2017. A 50% identity over 80%  
324 region was used to filter significant hits. LTRs were identified using LTR finder (39),  
325 LTRharvest (40) and BLASTn. LTR lengths were also defined as 100–1,000 bp.

326

327 **Detection of recombination mediated by PERVs.**

328 To search for proviruses involved in recombination and chromosomal rearrangements, we  
329 constructed a neighbor-joining tree of 5'- and 3'- LTR of full-length PERVs using  
330 MEGA7 (41) with Kimura 2-parameter distance estimates. LTRs less than 250 bp were  
331 not considered. Alignment was carried out with MAFFT 7.222 (42).

332

### 333 **Phylogenetic analyses.**

334 To determine the evolutionary relationship among PERVs, eJRVs and representative  
335 gammaretroviruses (S5 Table), phylogenetic trees were inferred with amino acid  
336 sequences. Full-length PERVs and PERVs with one LTR and at least one coding gene  
337 were used to construct phylogenetic trees. All Gag, Pol and Env protein sequences were  
338 aligned in MAFFT 7.222 and confirmed manually in MEGA7. The evolutionary history of  
339 these gammaretroviruses was then determined using the maximum-likelihood (ML)  
340 phylogenetic method available in PhyML 3.1 (43), incorporating 100 bootstrap replicates  
341 to determine the robustness. The best-fit JTT+ $\Gamma$  amino acid substitution model was  
342 selected for Gag, Pol and JTT+ $\Gamma$ +I for Env using the ProtTest 3.4.2 (44). All alignments  
343 can be found in Dataset S1

344

### 345 **Molecular dating of PERV, eJRV and ePCR.V.**

346 The 5' and 3' LTRs of ERVs are identical at the point of integration, and then diverge and  
347 evolve independently (45). So the ERV integration time can be calculated using the  
348 following relation:  $T = (D/R)/2$ , in which T is the invasion time (million years, MY), D is  
349 the number of nucleotide differences per site between the two LTRs, and R is the genomic

350 substitution rate (nucleotide substitutions per site, per year). We used the previously  
351 estimated average mammal substitution rate ( $2.2 \times 10^{-9}$  per site per year) (33), as no  
352 substitution rate ( $r$ ) has yet been estimated for the *S. Scrofa*, *J. jaculus* and *P. canpensis*.

353

## 354 **References**

- 355 1. **Ekser B, Cooper DKC, Tector AJ.** 2015. The need for xenotransplantation as a  
356 source of organs and cells for clinical transplantation. *Int J Surg* **23**:199-204.
- 357 2. **Ekser B, Ezzelarab M, Hara H, van der Windt DJ, Wijkstrom M, Bottino R,**  
358 **Trucco M, Cooper DK.** 2012. Clinical xenotransplantation: the next medical  
359 revolution? *Lancet* **379**:672-683.
- 360 3. **Niu D, Wei HJ, Lin L, George H, Wang T, Lee IH, Zhao HY, Wang Y, Kan Y,**  
361 **Shrock E, Lesha E, Wang G, Luo Y, Qing Y, Jiao D, Zhao H, Zhou X, Wang S,**  
362 **Wei H, Guell M, Church GM, Yang L.** 2017. Inactivation of porcine endogenous  
363 retrovirus in pigs using CRISPR-Cas9. *Science* **357**:1303-1307.
- 364 4. **Denner J.** 2017. Paving the Path toward Porcine Organs for Transplantation. *N*  
365 *Engl J Med* **377**:1891-1893.
- 366 5. **Wegman-Points LJ, Teoh-Fitzgerald ML, Mao G, Zhu Y, Fath MA, Spitz DR,**  
367 **Domann FE.** 2014. Retroviral-infection increases tumorigenic potential of MDA-  
368 MB-231 breast carcinoma cells by expanding an aldehyde dehydrogenase  
369 (ALDH1) positive stem-cell like population. *Redox Biol* **2**:847-854.
- 370 6. **Denner J, Young PR.** 2013. Koala retroviruses: characterization and impact on the  
371 life of koalas. *Retrovirology* **10**:108.

- 372 7. **Denner J, Tonjes RR.** 2012. Infection barriers to successful xenotransplantation  
373 focusing on porcine endogenous retroviruses. *Clin Microbiol Rev* **25**:318-343.
- 374 8. **Tonjes RR, Niebert M.** 2003. Relative age of proviral porcine endogenous  
375 retrovirus sequences in *Sus scrofa* based on the molecular clock hypothesis. *J Virol*  
376 **77**:12363-12368.
- 377 9. **Morozov VA, Wynyard S, Matsumoto S, Abalovich A, Denner J, Elliott R.**  
378 2017. No PERV transmission during a clinical trial of pig islet cell transplantation.  
379 *Virus Res* **227**:34-40.
- 380 10. **Crossan C, Mourad NI, Smith K, Gianello P, Scobie L.** 2018. Assessment of  
381 porcine endogenous retrovirus transmission across an alginate barrier used for the  
382 encapsulation of porcine islets. *Xenotransplantation*  
383 doi:10.1111/xen.12409:e12409.
- 384 11. **Wynyard S, Nathu D, Garkavenko O, Denner J, Elliott R.** 2014.  
385 Microbiological safety of the first clinical pig islet xenotransplantation trial in New  
386 Zealand. *Xenotransplantation* **21**:309-323.
- 387 12. **Moalic Y, Blanchard Y, Félix H, Jestin A.** 2006. Porcine Endogenous Retrovirus  
388 Integration Sites in the Human Genome: Features in Common with Those of  
389 Murine Leukemia Virus. *J Virol* **80**:10980-10988.
- 390 13. **Czuderna F, Fischer N, Boller K, Kurth R, Tonjes RR.** 2000. Establishment  
391 and characterization of molecular clones of porcine endogenous retroviruses  
392 replicating on human cells. *J Virol* **74**:4028-4038.
- 393 14. **Patience C, Takeuchi Y, Weiss RA.** 1997. Infection of human cells by an

- 394 endogenous retrovirus of pigs. *Nat Med* **3**:282-286.
- 395 15. **Li Z, Ping Y, Shengfu L, Hong B, Youping L, Yangzhi Z, Jingqiu C.** 2004.  
396 Phylogenetic relationship of porcine endogenous retrovirus (PERV) in Chinese  
397 pigs with some type C retroviruses. *Virus Res* **105**:167-173.
- 398 16. **Cui J, Tachedjian G, Tachedjian M, Holmes EC, Zhang S, Wang LF.** 2012.  
399 Identification of diverse groups of endogenous gammaretroviruses in mega- and  
400 microbats. *J Gen Virol* **93**:2037-2045.
- 401 17. **Niebert M, Tonjes RR.** 2005. Evolutionary spread and recombination of porcine  
402 endogenous retroviruses in the suiformes. *J Virol* **79**:649-654.
- 403 18. **Scheef G, Fischer N, Krach U, Tonjes RR.** 2001. The number of a U3 repeat box  
404 acting as an enhancer in long terminal repeats of polytropic replication-competent  
405 porcine endogenous retroviruses dynamically fluctuates during serial virus  
406 passages in human cells. *J Virol* **75**:6933-6940.
- 407 19. **Wilson CA, Laeeq S, Ritzhaupt A, Colon-Moran W, Yoshimura FK.** 2003.  
408 Sequence analysis of porcine endogenous retrovirus long terminal repeats and  
409 identification of transcriptional regulatory regions. *J Virol* **77**:142-149.
- 410 20. **Huh JW, Cho BW, Kim DS, Ha HS, Noh YN, Yi JM, Lee WH, Kim HS.** 2007.  
411 Long terminal repeats of porcine endogenous retroviruses in *Sus scrofa*. *Arch Virol*  
412 **152**:2271-2276.
- 413 21. **Niebert M, Kurth R, Tonjes RR.** 2003. Retroviral safety: analyses of phylogeny,  
414 prevalence and polymorphisms of porcine endogenous retroviruses. *Ann*  
415 *Transplant* **8**:56-64.

- 416 22. **Mayer J, Blomberg J, Seal RL.** 2011. A revised nomenclature for transcribed  
417 human endogenous retroviral loci. *Mob DNA* **2**:7.
- 418 23. **Johnson WE, Coffin JM.** 1999. Constructing primate phylogenies from ancient  
419 retrovirus sequences. *Proc Natl Acad Sci U S A* **96**:10254-10260.
- 420 24. **Hughes JF, Coffin JM.** 2001. Evidence for genomic rearrangements mediated by  
421 human endogenous retroviruses during primate evolution. *Nat Genet* **29**:487-489.
- 422 25. **Lole KS, Bollinger RC, Paranjape RS, Gadkari D, Kulkarni SS, Novak NG,  
423 Ingersoll R, Sheppard HW, Ray SC.** 1999. Full-length human immunodeficiency  
424 virus type 1 genomes from subtype C-infected seroconverters in India, with  
425 evidence of intersubtype recombination. *J Virol* **73**:152-160.
- 426 26. **Zhuo X, Feschotte C.** 2015. Cross-Species Transmission and Differential Fate of  
427 an Endogenous Retrovirus in Three Mammal Lineages. *PLoS Pathog*  
428 **11**:e1005279.
- 429 27. **Martoglio B, Graf R, Dobberstein B.** 1997. Signal peptide fragments of  
430 preprolactin and HIV-1 p-gp160 interact with calmodulin. *Embo j* **16**:6636-6645.
- 431 28. **Corbet S, Muller-Trutwin MC, Versmisse P, Delarue S, Ayouba A, Lewis J,  
432 Brunak S, Martin P, Brun-Vezinet F, Simon F, Barre-Sinoussi F, Mauclore P.**  
433 2000. env sequences of simian immunodeficiency viruses from chimpanzees in  
434 Cameroon are strongly related to those of human immunodeficiency virus group N  
435 from the same geographic area. *J Virol* **74**:529-534.
- 436 29. **Argaw T, Wilson CA.** 2012. Detailed mapping of determinants within the porcine  
437 endogenous retrovirus envelope surface unit identifies critical residues for human



- 438 cell infection within the proline-rich region. *J Virol* **86**:9096-9104.
- 439 30. **Watanabe R, Miyazawa T, Matsuura Y.** 2005. Cell-binding properties of the  
440 envelope proteins of porcine endogenous retroviruses. *Microbes Infect* **7**:658-665.
- 441 31. **Denner J.** 2008. Recombinant porcine endogenous retroviruses (PERV-A/C): a  
442 new risk for xenotransplantation? *Arch Virol* **153**:1421-1426.
- 443 32. **Ericsson TA, Takeuchi Y, Templin C, Quinn G, Farhadian SF, Wood JC,**  
444 **Oldmixon BA, Suling KM, Ishii JK, Kitagawa Y, Miyazawa T, Salomon DR,**  
445 **Weiss RA, Patience C.** 2003. Identification of receptors for pig endogenous  
446 retrovirus. *Proc Natl Acad Sci U S A* **100**:6759-6764.
- 447 33. **Kumar S, Subramanian S.** 2002. Mutation rates in mammalian genomes. *Proc*  
448 *Natl Acad Sci U S A* **99**:803-808.
- 449 34. **Frantz LAF.** 2015. Speciation and domestication in Suiformes: a genomic  
450 perspective. Wageningen University.
- 451 35. **Zhang Q, Xia L, Kimura Y, Shenbrot G, Zhang Z, Ge D, Yang Q.** 2013.  
452 Tracing the Origin and Diversification of Dipodoidea (Order: Rodentia): Evidence  
453 from Fossil Record and Molecular Phylogeny. *Evolutionary Biology* **40**:32-44.
- 454 36. **Denner J.** 2016. How Active Are Porcine Endogenous Retroviruses (PERVs)?  
455 *Viruses* **8**.
- 456 37. **Hayward A, Cornwallis CK, Jern P.** 2015. Pan-vertebrate comparative genomics  
457 unmasks retrovirus macroevolution. *Proc Natl Acad Sci U S A* **112**:464-469.
- 458 38. **Altschul SF, Gish W, Miller W, Myers EW, Lipman DJ.** 1990. Basic local  
459 alignment search tool. *J Mol Biol* **215**:403-410.

- 460 39. **Xu Z, Wang H.** 2007. LTR\_FINDER: an efficient tool for the prediction of full-  
461 length LTR retrotransposons. *Nucleic Acids Res* **35**:W265-268.
- 462 40. **Ellinghaus D, Kurtz S, Willhoeft U.** 2008. LTRharvest, an efficient and flexible  
463 software for de novo detection of LTR retrotransposons. *BMC Bioinformatics*  
464 doi:10.1186/1471-2105-9-18.
- 465 41. **Kumar S, Stecher G, Tamura K.** 2016. MEGA7: Molecular Evolutionary  
466 Genetics Analysis Version 7.0 for Bigger Datasets. *Mol Biol Evol* **33**:1870-1874.
- 467 42. **Katoh K, Standley DM.** 2013. MAFFT multiple sequence alignment software  
468 version 7: improvements in performance and usability. *Mol Biol Evol* **30**:772-780.
- 469 43. **Guindon S, Dufayard JF, Lefort V, Anisimova M, Hordijk W, Gascuel O.**  
470 2010. New algorithms and methods to estimate maximum-likelihood phylogenies:  
471 assessing the performance of PhyML 3.0. *Syst Biol* **59**:307-321.
- 472 44. **Abascal F, Zardoya R, Posada D.** 2005. ProtTest: selection of best-fit models of  
473 protein evolution. *Bioinformatics* **21**:2104-2105.
- 474 45. **Dangel AW, Baker BJ, Mendoza AR, Yu CY.** 1995. Complement component C4  
475 gene intron 9 as a phylogenetic marker for primates: long terminal repeats of the  
476 endogenous retrovirus ERV-K(C4) are a molecular clock of evolution.  
477 *Immunogenetics* **42**:41-52.
- 478
- 479
